# Supplementary material
Source: PubMed Central journal article supplement (PMC6561343)

## Supporting Information

Grider MH<sup>1</sup>, Park D, Spencer DM, Shine HD, Lipid raft-targeted Akt promotes axonal branching and growth cone expansion via mTOR and Rac1, respectively. *J Neurosci Res.* 2009 Nov 1;87(14):3033-42. doi: 10.1002/jnr.22140.

**Supporting Information Figure 1.** Expression of myristoylated forms of non-biologically active proteins does not influence neuronal morphology. Neurons that expressed myristoylated forms of EGFP (Ms.EGFP or Mf.EGFP) were not different from neurons that expressed cytosolic EGFP-N1 in soma area, the number of axonal branch points, or growth cone area.

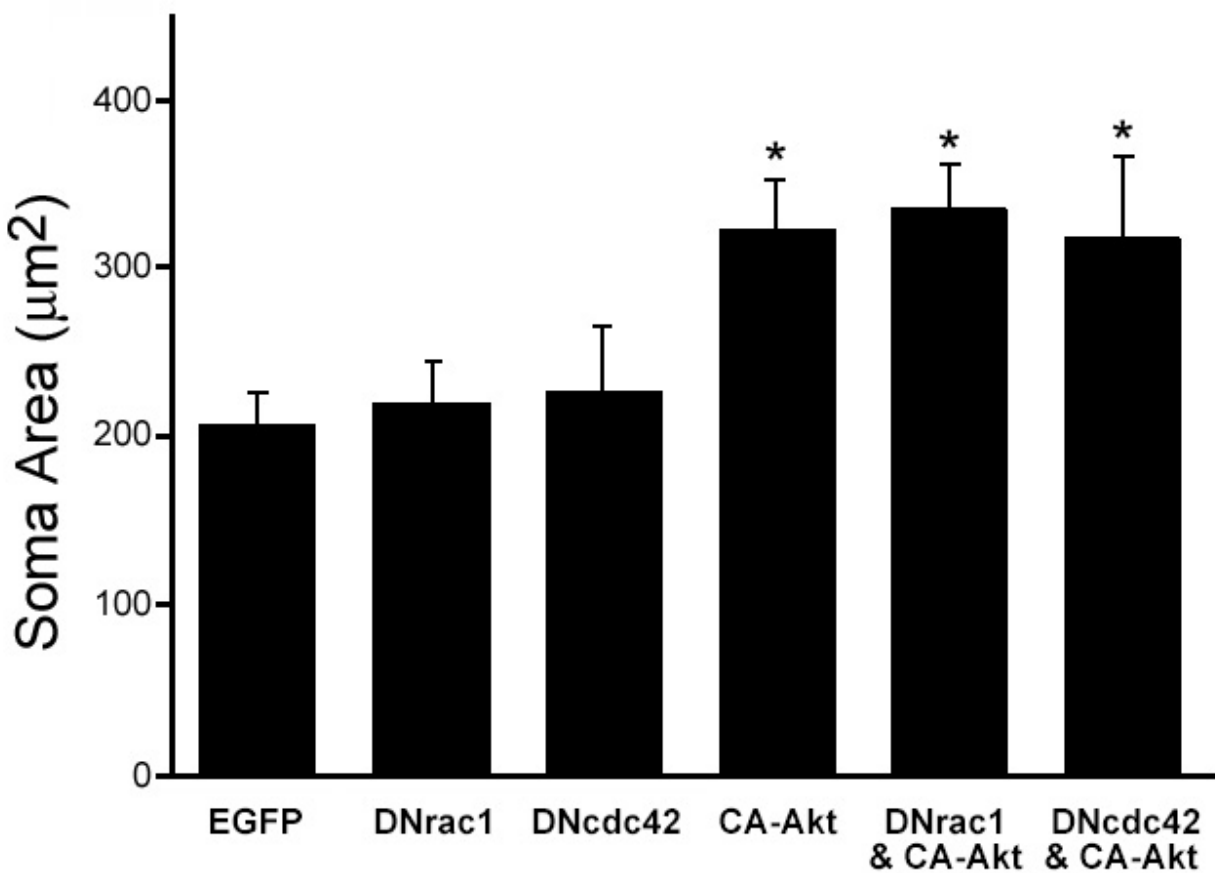

**Supporting Information Figure 2.** Rapamycin does not influence growth cone expansion. Compared to neurons that expressed the control protein EGFP, neurons that expressed CA-Akt had significantly larger growth cones in the absence ( $p=0.038$ ) or presence ( $p=.046$ ) of rapamycin (100nM). In neurons that expressed CA-Akt, the growth cone area was not significantly different between neurons incubated in the presence or absence of rapamycin ( $p=.63$ ).

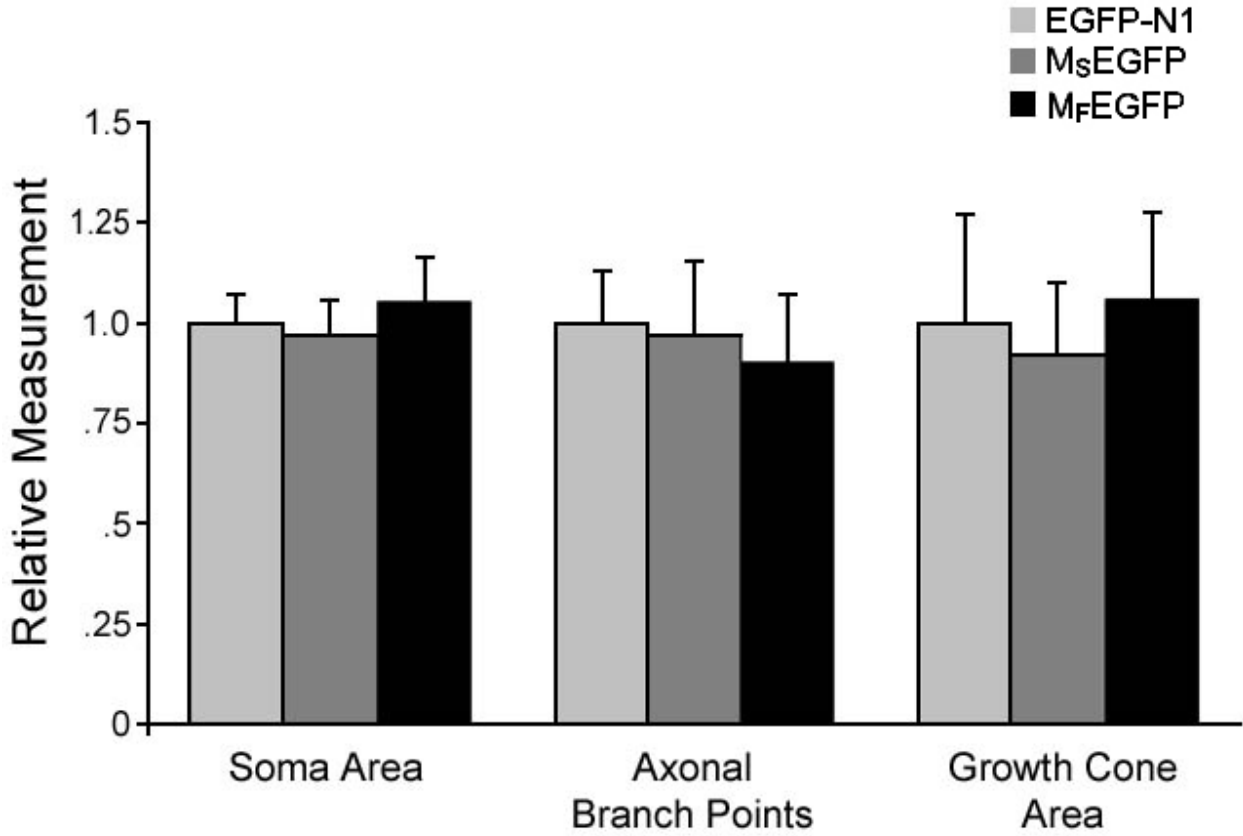

**Supporting Information Figure 3.** Decreased Rac1 or Cdc42 activity does not influence soma area. The size of neuronal cell bodies was larger in neurons that expressed MF $\Delta$ Akt, compared to neurons that expressed EGFP. Co-expression of DNrac1 or DNcdc42 did not affect soma area in neurons that expressed either EGFP or CA-Akt.

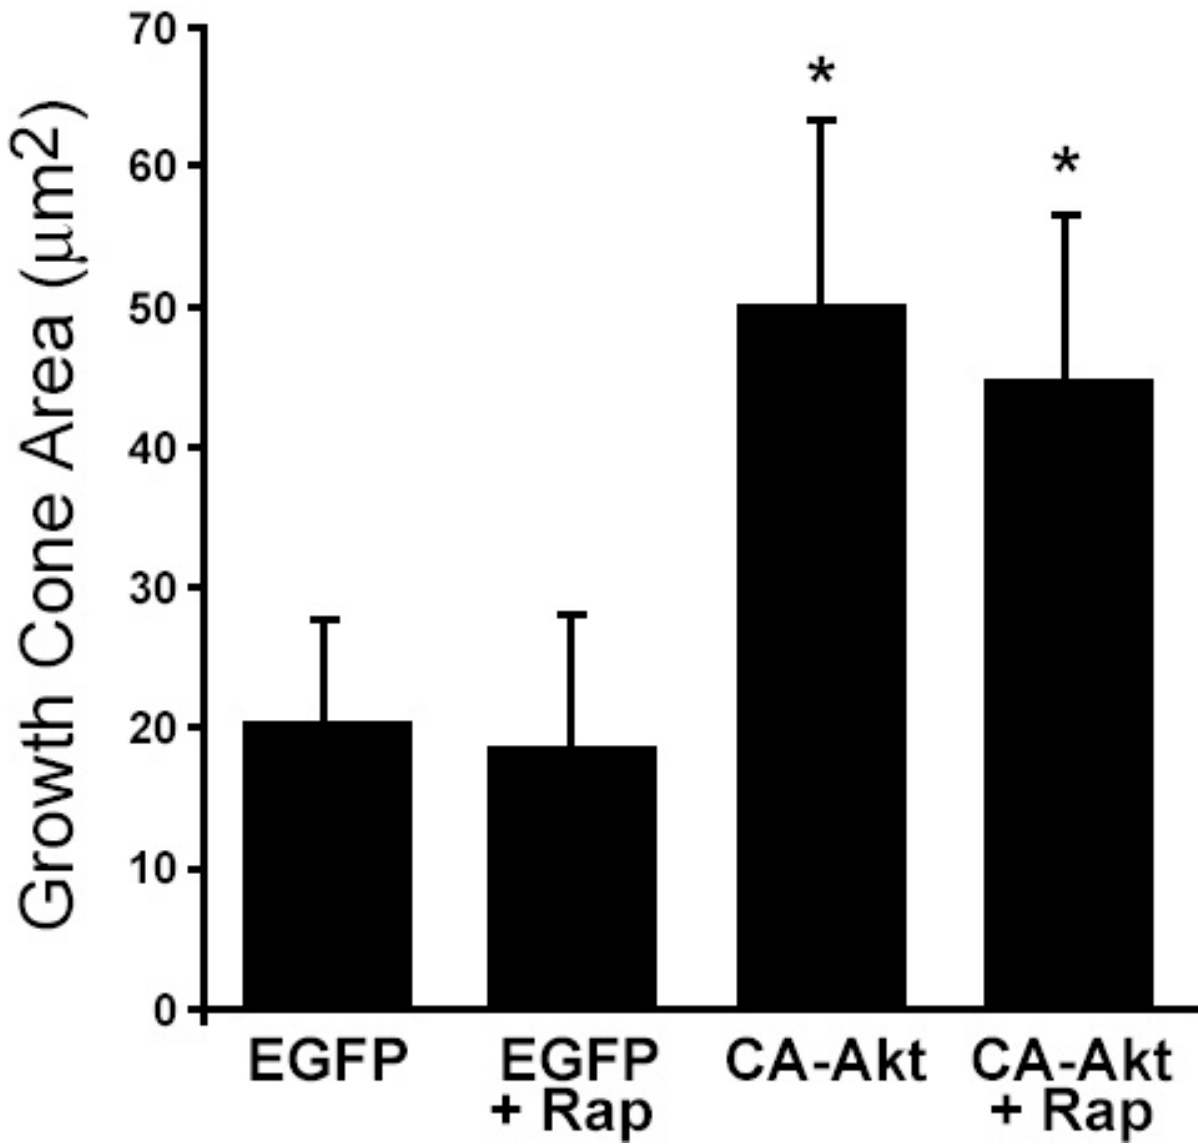

**Supporting Information Figure 4.** Decreased Rac1 or Cdc42 activity does not influence axonal branching.

Expression of CA-Akt in DRG neurons increased axonal branching compared to expression of EGFP. Co-expression of DNrac1 or DNcdc42 did not affect axonal branching in neurons that expressed either EGFP or CA-Akt. Neurons transduced with MSΔAkt or MFΔAkt were immunoreactive for an antibody directed against HA (αHA) within 6 hours following transduction, and were strongly EGFP-positive within 24 hours. The small gold bead (arrowhead) from biolistic transduction was often observed within the soma.

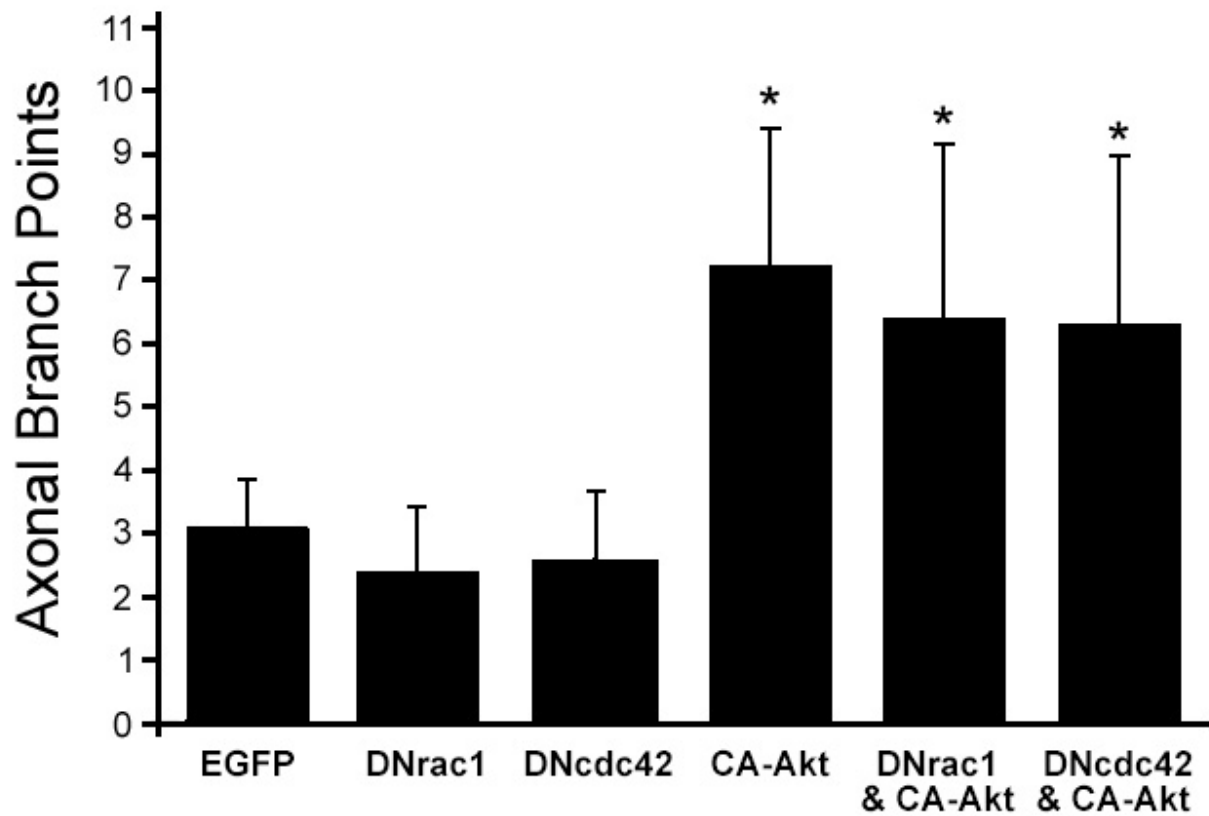

Supplement: NIHMS968924-supplement-Supplemental.pdf [file NIHMS968924-supplement-Supplemental.pdf]
